# Supplementary material for: CO2 capture under humid conditions in NH2-MIL-53(Al): the influence of the amine functional group
Source: Royal Society of Chemistry journal article supplement (doi:10.1039/c5ra26517g), 2016-01-01
Supplement: c5ra26517g1.pdf [file c5ra26517g1.pdf]

## ELECTRONIC SUPPLEMENTARY INFORMATION

### **CO<sub>2</sub> capture under humid conditions in NH<sub>2</sub>-MIL-53(Al): the influence of the amine functional group**

Antonio Zárate,<sup>†a</sup> Ricardo A. Peralta,<sup>†a</sup> Peter A. Bayliss,<sup>b</sup> Rowena Howie,<sup>b</sup> Mayra Sánchez-Serratos,<sup>a</sup> Paulina Carmona-Monroy,<sup>a</sup> Diego Solís-Ibarra,<sup>\*a</sup> Eduardo González-Zamora<sup>\*c</sup> and Ilich A. Ibarra<sup>\*a</sup>

<sup>a</sup> *Instituto de Investigaciones en Materiales, Universidad Nacional Autónoma de México, Circuito Exterior s/n, CU, Del. Coyoacán, 04510, México D. F., Mexico. E-mail: argel@unam.mx*

<sup>b</sup> *School of Chemistry, University of Nottingham, University Park, NG7 2RD, UK.*

<sup>c</sup> *Departamento de Química, Universidad Autónoma Metropolitana-Iztapalapa, San Rafael Atlixco 186, Col. Vicentina, Iztapalapa, C. P. 09340, México D. F., Mexico.*

## 1. Materials and measurements

All reagents and solvents were used as received from commercial suppliers without further purification. Powder X-ray diffraction (PXRD) data were collected under ambient conditions on a Bruker AXD D8 Advance diffractometer operated at 160 W (40 kV, 40 mA) for Cu  $K\alpha_1$  ( $\lambda = 1.5406 \text{ \AA}$ ). Thermal gravimetric analysis (TGA) was performed under  $N_2$  at a scan rate of  $2 \text{ }^\circ\text{C}/\text{min}$  using a TA Instruments Q500HR analyser.  $N_2$  adsorption was carried out in a conventional volumetric technique by a Micromeritics ASAP 2020 sorptometer. The surface area was calculated using the BET method based on adsorption data in the partial pressure ( $p/p_0$ ) range 0.01 to 0.04. Dynamic and isothermal experiments were performed using a humidity-controlled thermobalance (TA Instruments, model Q5000SA) at  $30 \text{ }^\circ\text{C}$  and relative humidities (RH) of 5, 10 and 30%. Fourier transform Infrared (FTIR) spectroscopy spectra were obtained on a Bruker Alpha spectrometer equipped with an attenuated total reflectance (ATR) accessory. The samples MIL-53(Al) and  $NH_2$ -MIL-53(Al) were synthesised using a continuous flow approach<sup>1</sup> and calcined (extraction of terephthalic and 2-amino-terephthalic acid from the pores) in an oven at  $330 \text{ }^\circ\text{C}$  for 3 days. Thus, both samples are labelled as post-synthesised.

**Continuous process for the synthesis of materials MIL-53(Al) and  $NH_2$ -MIL-53(Al).** A total flow rate of  $3.0 \text{ mL min}^{-1}$  of water was adjusted and the pressure of the system was set at 230 bar. The temperature of the pre-heater (and the reactor) was set to  $300 \text{ }^\circ\text{C}$  and  $250 \text{ }^\circ\text{C}$ , respectively. Once the temperature was stable, the streams were changed to metal salt and ligand solutions and the flows passed through Filter 1 for 20 min. Then, the 3-way valve was switched to Filter 2 and next batch of product collected for 20 min, while product in Filter 1 was collected and a new filter inserted. After 20 min, the 3-way valve was turned to Filter 1, new reaction conditions set and while the product in Filter 2 was collected in the filter, more product was collect in Filter 1. (See Scheme S1).<sup>1</sup>

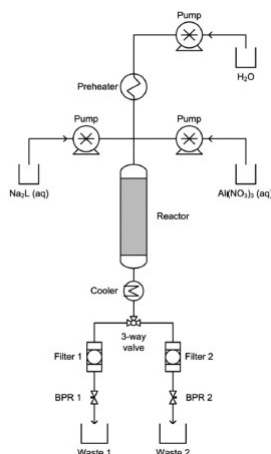

**Scheme S1:** Schematic representation of the continuous process.<sup>1</sup>

## 2. TGA plots

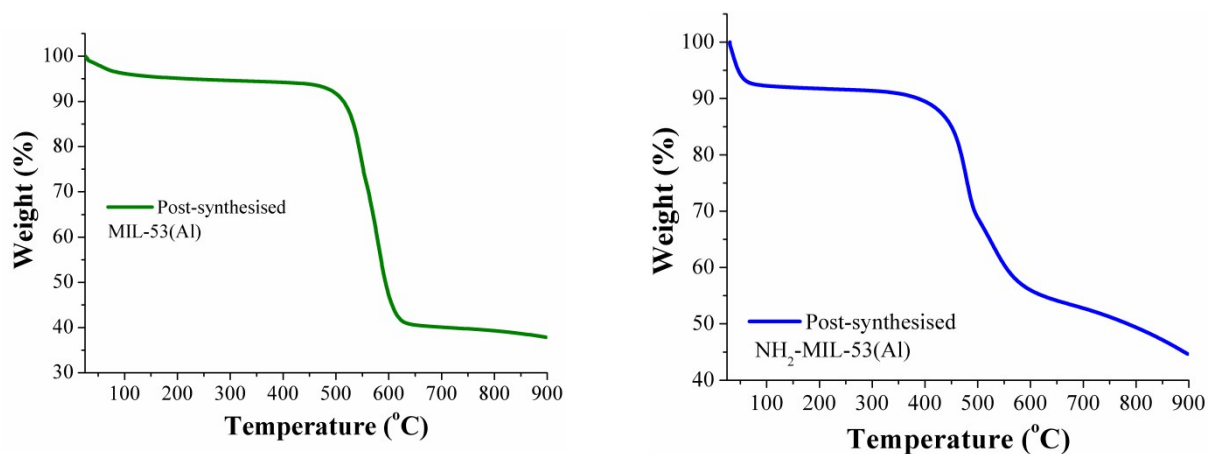

**Fig. S1:** TGA analyses of: (right) post-synthesised MIL-53(Al) and (left) post-synthesised NH<sub>2</sub>-MIL-53(Al).

## 3. Powder X-ray diffraction patterns of MIL-53(Al) and NH<sub>2</sub>-MIL-53(Al)

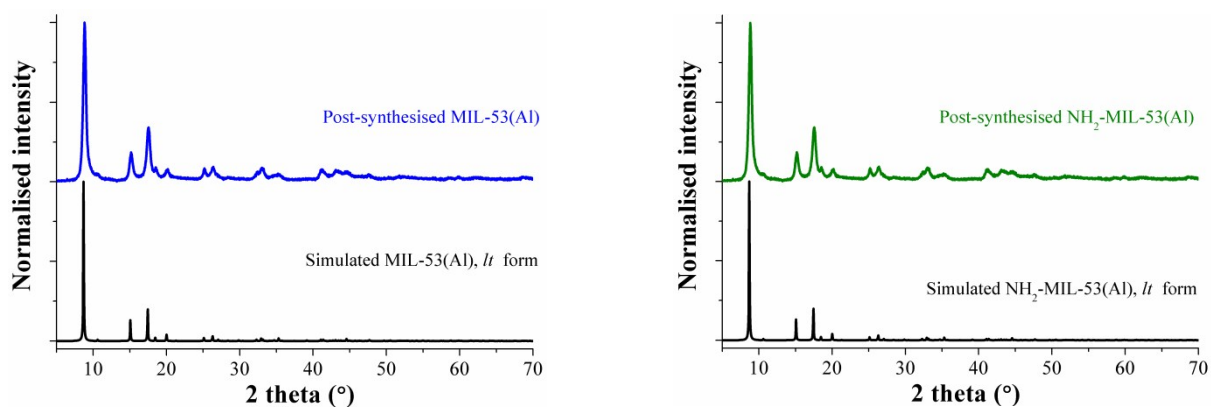

**Fig. S2:** PXR D patters of: (left) simulated, *lt* form, (black) and post-synthesised (blue) MIL-53(Al) and (right) simulated, *lt* form, (black) and post-synthesised (green) NH<sub>2</sub>-MIL-53(Al).

**4. PXRD and BET surface areas of each MIL-53(Al) and NH<sub>2</sub>-MIL-53(Al) samples after the kinetic CO<sub>2</sub> isotherms.**

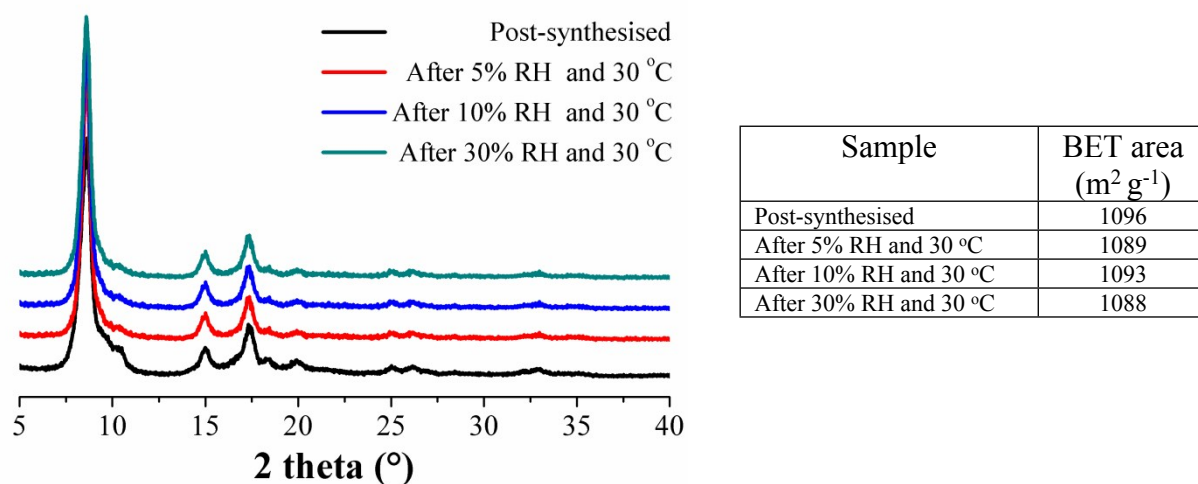

**Fig. S3:** (left) PXRD patterns of each MIL-53(Al) samples after the kinetic CO<sub>2</sub> isotherms were carried out at different relative humidities; (right) BET areas of each MIL-53(Al) samples after the kinetic CO<sub>2</sub> isotherms were carried out at different relative humidities.

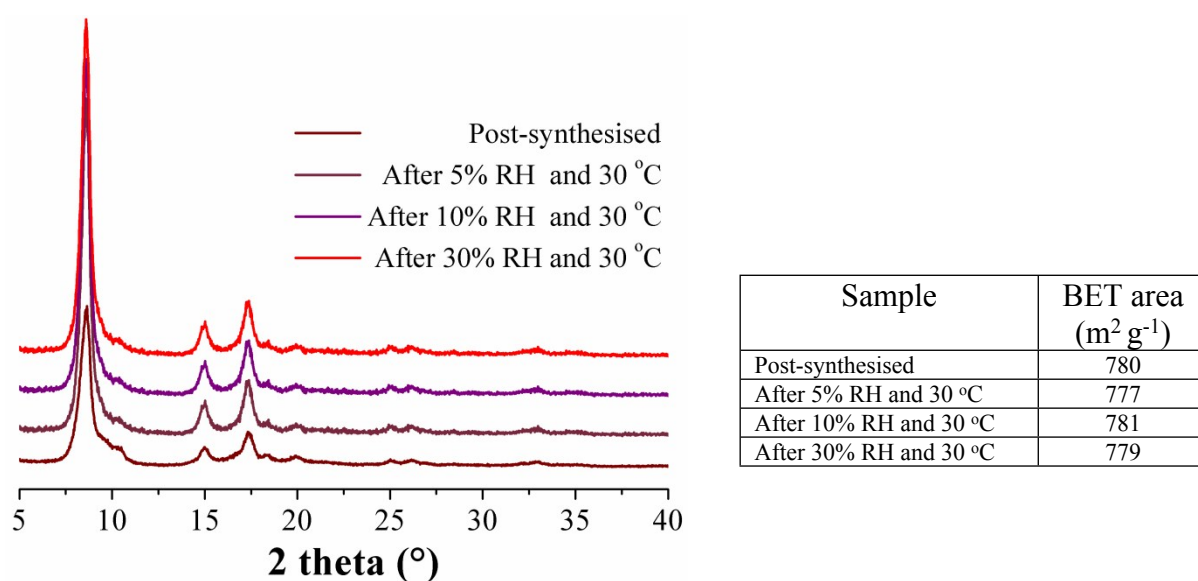

**Fig. S4:** (left) PXRD patterns of each NH<sub>2</sub>-MIL-53(Al) samples after the kinetic CO<sub>2</sub> isotherms were carried out at different relative humidities; (right) BET areas of each MIL-53(Al) samples after the kinetic CO<sub>2</sub> isotherms were carried out at different relative humidities.

## References

1. P. A. Bayliss, I. A. Ibarra, E. Pérez, S. Yang, C. C. Tang, M. Poliakoff and M. Schröder, *Green Chem.*, 2014, **16**, 3796.
